# Supplementary material for: In search of the elusive amalgam SrHg8: a mercury-rich intermetallic compound with augmented pentagonal prisms
Source: Royal Society of Chemistry journal article supplement (doi:10.1039/c0dt00304b), 2010-01-01
Supplement: c0dt00304b.pdf [file c0dt00304b.pdf]

## SUPPLEMENTARY INFORMATION

### **In search of the elusive amalgam SrHg<sub>8</sub>: a mercury-rich intermetallic with augmented pentagonal prisms**

Andriy V. Tkachuk and Arthur Mar\*

**Table S1** Selected interatomic distances in SrHg<sub>8</sub>

**Figure S1** Hg-centred coordination polyhedra in SrHg<sub>8</sub>, classified into (a) augmented tetragonal prisms and (b) augmented trigonal prisms. The blue circles are Sr atoms and the red circles are Hg atoms.

---

\* *Department of Chemistry, University of Alberta, Edmonton, Alberta, Canada T6G 2G2. E-mail: arthur.mar@ualberta.ca; Fax: 780 492 8231; Tel: 780 492 5592*

**Table S1** Selected interatomic distances in SrHg<sub>8</sub><sup>a</sup>

|      | Sr1<br>CN15+3      | Sr2<br>CN16+2               | Hg1<br>CN12                 | Hg2<br>CN13        | Hg3<br>CN12        | Hg4<br>CN11        | Hg5<br>CN12                 | Hg6<br>CN13        | Hg7<br>CN13        | Hg8<br>CN12        | Hg9<br>CN13                 | Hg10<br>CN12       | Hg11<br>CN11       | Hg12<br>CN9        | Hg13<br>CN10       | Hg14<br>CN11                | Hg15<br>CN10       | Hg16<br>CN11                |
|------|--------------------|-----------------------------|-----------------------------|--------------------|--------------------|--------------------|-----------------------------|--------------------|--------------------|--------------------|-----------------------------|--------------------|--------------------|--------------------|--------------------|-----------------------------|--------------------|-----------------------------|
| Sr1  |                    |                             |                             | 3.723              | 3.470 <sup>2</sup> | 3.442 <sup>2</sup> |                             | 3.702              | 3.698<br>3.703     | 3.433 <sup>2</sup> |                             | 3.932              |                    |                    | 3.529 <sup>2</sup> |                             | 3.533 <sup>2</sup> |                             |
| Sr2  |                    |                             |                             | 3.583 <sup>2</sup> | 3.593              |                    |                             | 3.609 <sup>2</sup> |                    | 3.545              | 3.451                       |                    | 3.392              | 3.471 <sup>2</sup> |                    | 3.405 <sup>2</sup><br>3.884 |                    | 3.474 <sup>2</sup><br>3.750 |
| Hg1  | (4.030)            |                             | 3.585 <sup>2</sup>          |                    |                    |                    | 2.879<br>3.110 <sup>2</sup> | 3.063              |                    |                    | 3.447<br>3.803 <sup>2</sup> | 2.997              |                    |                    |                    |                             | 2.986 <sup>2</sup> |                             |
| Hg2  | 3.723              | 3.583 <sup>2</sup>          |                             |                    | 3.621 <sup>2</sup> |                    |                             |                    | 3.107              |                    |                             | 3.588              | 3.191 <sup>2</sup> | 2.904              | 3.040 <sup>2</sup> |                             |                    | 2.950                       |
| Hg3  | 3.470 <sup>2</sup> | 3.593                       |                             | 3.621 <sup>2</sup> |                    | 2.856              |                             |                    | 3.501 <sup>2</sup> | 2.968              |                             |                    |                    | 2.942 <sup>2</sup> | 2.884              |                             |                    |                             |
| Hg4  | 3.442 <sup>2</sup> |                             |                             |                    | 2.856              |                    | 3.289                       |                    | 3.172 <sup>2</sup> |                    |                             | 3.012 <sup>2</sup> | 3.163              |                    | 3.471              |                             | 3.004              |                             |
| Hg5  |                    |                             | 2.879<br>3.110 <sup>2</sup> |                    |                    | 3.289              |                             | 3.717              |                    |                    | 3.063 <sup>2</sup>          | 3.098 <sup>2</sup> | 3.072              |                    |                    | 3.422                       | 3.212              |                             |
| Hg6  | 3.702              | 3.609 <sup>2</sup>          | 3.063                       |                    |                    |                    | 3.717                       |                    |                    | 3.434 <sup>2</sup> | 3.212 <sup>2</sup>          |                    |                    | 2.905              |                    | 2.957                       | 3.196 <sup>2</sup> |                             |
| Hg7  | 3.698<br>3.703     |                             |                             | 3.107              | 3.501 <sup>2</sup> | 3.172 <sup>2</sup> |                             |                    |                    | 3.661 <sup>2</sup> |                             | 2.973              |                    | 2.933              | 3.010 <sup>2</sup> |                             |                    |                             |
| Hg8  | 3.433 <sup>2</sup> | 3.545                       |                             |                    | 2.968              |                    |                             | 3.434 <sup>2</sup> | 3.661 <sup>2</sup> |                    |                             |                    |                    | 3.016 <sup>2</sup> | 2.879              |                             | 2.882              |                             |
| Hg9  |                    | 3.451                       | 3.447<br>3.803 <sup>2</sup> |                    |                    |                    | 3.063 <sup>2</sup>          | 3.212 <sup>2</sup> |                    |                    |                             | 3.238              |                    |                    |                    | 3.200 <sup>2</sup>          | 3.084              | 3.156                       |
| Hg10 | 3.932              |                             | 2.997                       | 3.588              |                    | 3.012 <sup>2</sup> | 3.098 <sup>2</sup>          |                    | 2.973              |                    | 3.238                       |                    | 3.098 <sup>2</sup> |                    |                    |                             |                    | 3.502                       |
| Hg11 |                    | 3.392                       |                             | 3.191 <sup>2</sup> |                    | 3.163              | 3.072                       |                    |                    |                    |                             | 3.098 <sup>2</sup> |                    |                    | 2.999              | 3.044                       |                    | 3.132 <sup>2</sup>          |
| Hg12 | (4.067)<br>(4.136) | 3.471 <sup>2</sup>          |                             | 2.904              | 2.942 <sup>2</sup> |                    |                             | 2.905              | 2.933              | 3.016 <sup>2</sup> |                             |                    |                    |                    |                    |                             |                    |                             |
| Hg13 | 3.529 <sup>2</sup> | (4.358)                     |                             | 3.040 <sup>2</sup> | 2.884              | 3.471              |                             |                    | 3.010 <sup>2</sup> | 2.879              |                             |                    | 2.999              |                    |                    |                             |                    |                             |
| Hg14 |                    | 3.405 <sup>2</sup><br>3.884 |                             |                    |                    |                    | 3.422                       | 2.957              |                    |                    | 3.200 <sup>2</sup>          |                    | 3.044              |                    |                    |                             |                    | 2.947 <sup>2</sup><br>3.007 |
| Hg15 | 3.533 <sup>2</sup> | (4.670)                     | 2.986 <sup>2</sup>          |                    |                    | 3.004              | 3.212                       | 3.196 <sup>2</sup> |                    | 2.882              | 3.084                       |                    |                    |                    |                    |                             |                    |                             |
| Hg16 |                    | 3.474 <sup>2</sup><br>3.750 |                             | 2.950              |                    |                    |                             |                    |                    |                    | 3.156                       | 3.502              | 3.132 <sup>2</sup> |                    |                    | 2.947 <sup>2</sup><br>3.007 |                    |                             |

<sup>a</sup> Standard uncertainties range from 0.001 to 0.003 Å. A distance cutoff of 4.0 Å was used; slightly longer distances around the coordination environment of Sr atoms are also indicated. When read down, the number of distances listed (superscripts indicate the number of times a distance occurs) corresponds to the CN in the column header.

(a)

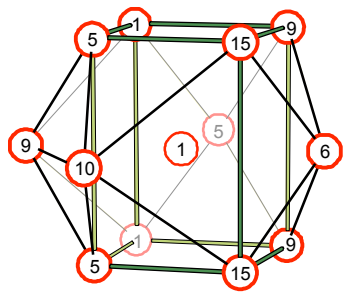

Hg1 CN12

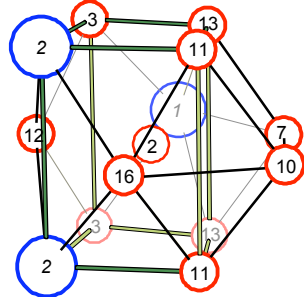

Hg2 CN13

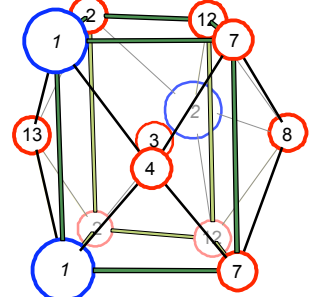

Hg3 CN12

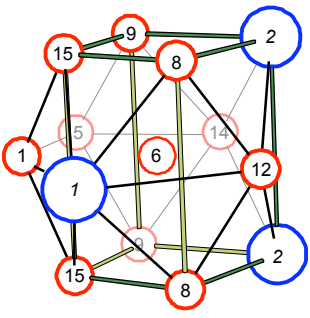

Hg6 CN13

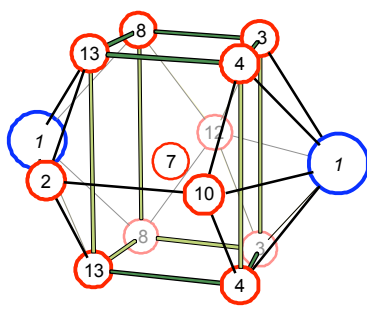

Hg7 CN13

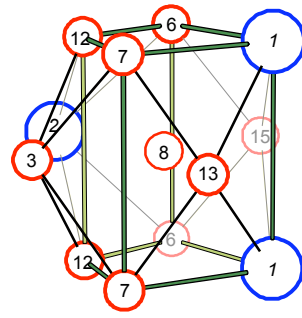

Hg8 CN12

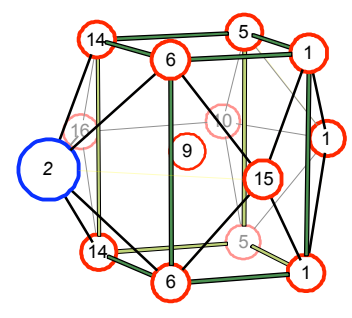

Hg9 CN13

(b)

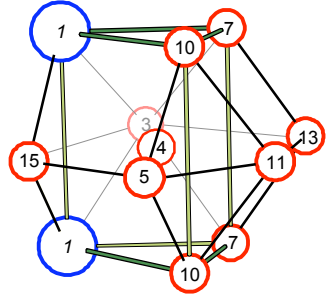

Hg4 CN11

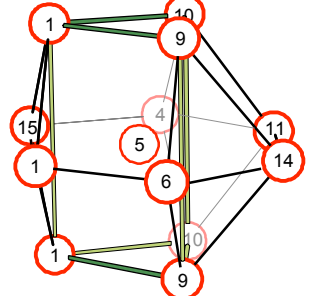

Hg5 CN12

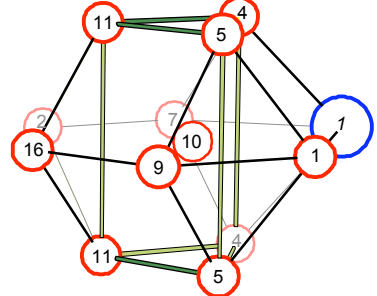

Hg10 CN12

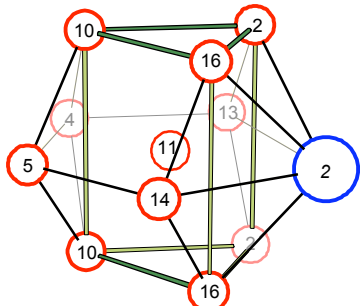

Hg11 CN11

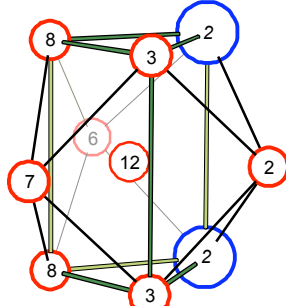

Hg12 CN9

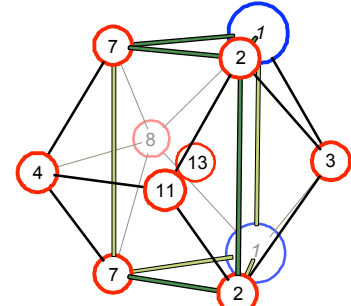

Hg13 CN10

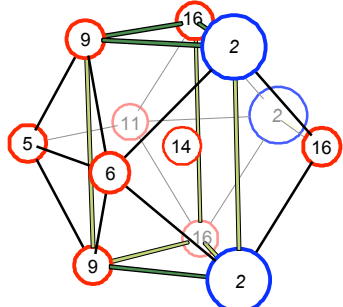

Hg14 CN11

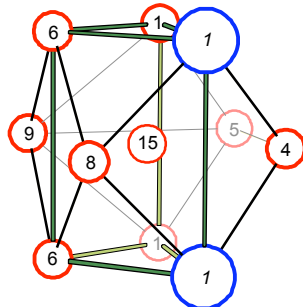

Hg15 CN10

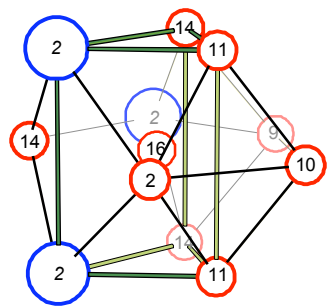

Hg16 CN11
